# Supplementary material for: Templated bipolar electrolysis for fabrication of robust Co and Pt nanorods
Source: Royal Society of Chemistry journal article supplement (doi:10.1039/c8cc05986a), 2018-01-01
Supplement: c8cc05986a1.pdf [file c8cc05986a1.pdf]

Electronic Supplementary Information

Templated Bipolar Electrolysis for Fabrication of Robust Co and Pt  
Nanorods

Yuki Koizumi, Kaoru Endo, Hiroki Nishiyama, Ikuyoshi Tomita and Shinsuke Inagi\*

Department of Chemical Science and Engineering, School of Materials and Chemical Technology,

Tokyo Institute of Technology, 4259 Nagatsuta-cho, Midori-ku, Yokohama 226-8502, Japan

## Experimental

### *Materials*

Cobalt(II) chloride hexahydrate ( $\text{CoCl}_2 \cdot 6\text{H}_2\text{O}$ ), hydroquinone (HQ), hexachloroplatinic(IV) acid ( $\text{H}_2\text{PtCl}_6 \cdot 6\text{H}_2\text{O}$ ), and anhydrous acetonitrile (MeCN) were purchased from Wako. Platinum(II) acetylacetonate ( $\text{Pt}(\text{acac})_2$ ) was purchased from Aldrich. Tetrabutylammonium perchlorate was purchased from Tokyo Chemical Industry. All reagents and dry acetonitrile were used without further purification. All aqueous solutions were prepared with deionized water. Electrolytic solutions were deaerated by an intensive Ar bubbling just before use. Anodic aluminum oxide (AAO) membrane (200 nm pore size, 60  $\mu\text{m}$  thickness, 13 mm diameter, Anodisc 13) was purchased from Whatman. Indium-tin-oxide (ITO) glass plates (10  $\Omega/\square$ ) were purchased from Kinoene Optical Co. Ltd.

### *Instruments*

Direct current (DC) power was supplied to the feeder electrodes using an EC1000SA AC/DC power source (NF Corporation). Optical microscope observations were conducted with an Olympus SZX10, Laser microscope observations were conducted with a Keyence VK-X1000, and scanning electron microscopy (SEM) observation was performed using a Shimadzu SS-550. Cyclic voltammetry (CV) measurements were carried out using an ALS 6005C Electrochemical Analyzer.

### *Cell configuration*

The glass cell equipped with Pt feeder electrodes (20 mm  $\times$  20 mm, distance: 60 mm) was filled with an electrolytic solution. An AAO membrane (200 nm pore size, 60  $\mu\text{m}$  thickness, 13 mm diameter) coated on one side with Au was embedded on an ITO (20 mm  $\times$  20 mm) with epoxy resin, which was also connected to another ITO (20 mm  $\times$  20 mm) with a stainless-steel wire (length: 0.5 or 2 cm). This complex material was placed between the feeder electrodes to be a BPE.

### Estimation of $\Delta V_{BPE}$

The minimum applied voltage required to induce BPE ( $\Delta V_{min}$ ) was estimated from the difference between the oxidation and reduction potentials of the corresponding species,  $E_{ox}$  and  $E_{red}$ , (Eq. 1), as previously reported.<sup>1</sup>

$$\Delta V_{min} = |E_{ox} - E_{red}| \quad (1)$$

In this system, the oxidation of HQ and the reduction of  $Co^{2+}$ ,  $Pt^{2+}$ , or  $[PtCl_6]^{2-}$  were assumed to occur simultaneously on the BPE. By using the onset potentials of these half reactions (Fig. S1–S3),  $\Delta V_{min}$  was estimated using Eq. 2, Eq. 3, or Eq. 4

$$\Delta V_{min} = |E_{ox} - E_{red}| = |1.71 \text{ V} - (-1.41 \text{ V})| = 3.12 \text{ V} \quad (2)$$

$$\Delta V_{min} = |E_{ox} - E_{red}| = |1.71 \text{ V} - (-1.19 \text{ V})| = 2.90 \text{ V} \quad (3)$$

$$\Delta V_{min} = |E_{ox} - E_{red}| = |1.71 \text{ V} - (-0.08 \text{ V})| = 1.79 \text{ V} \quad (4)$$

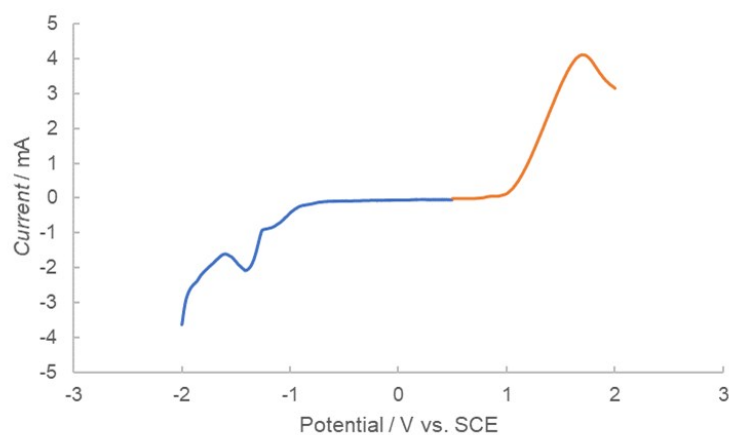

**Fig. S1** Linear sweep voltammograms of  $CoCl_2$  (10 mM) and HQ (10 mM) measured independently in 0.1 M  $Bu_4NClO_4/MeCN$  using an Au working electrode (10 mm  $\times$  10 mm) for 0.5–2 V and a ITO working electrode (10 mm  $\times$  10 mm) for 0.5–2 V, respectively, at a scan rate of 100 mV/s.

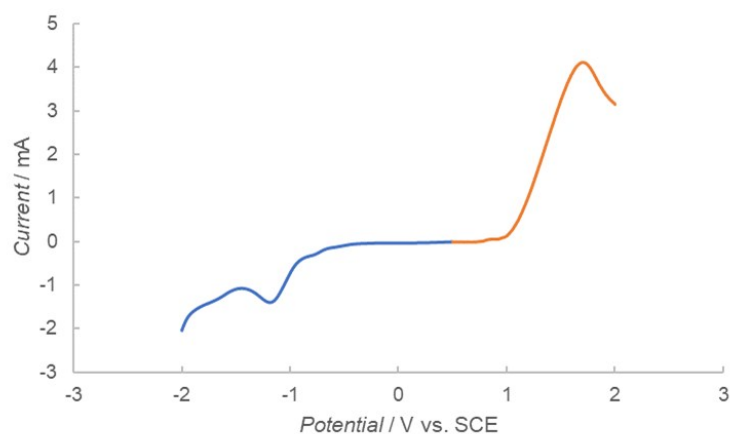

**Fig. S2** Linear sweep voltammograms of Pt(acac)<sub>2</sub> (10 mM) and HQ (10 mM) measured independently in 0.1 M Bu<sub>4</sub>NClO<sub>4</sub>/MeCN using an Au working electrode (10 mm × 10 mm) for 0.5–2 V and a ITO working electrode (10 mm × 10 mm) for 0.5–2 V, respectively, at a scan rate of 100 mV/s.

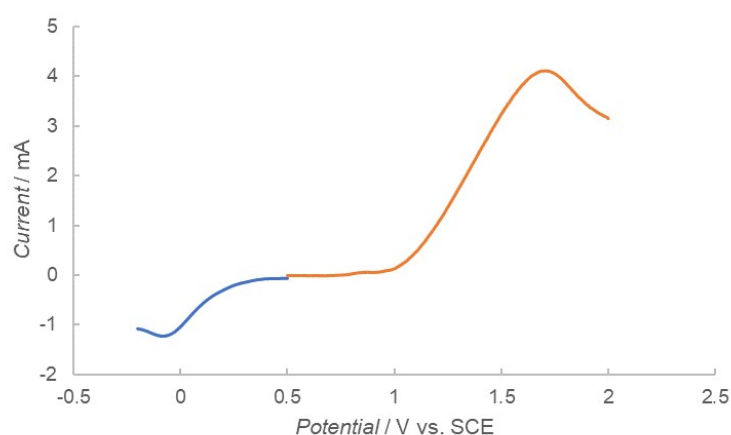

**Fig. S3** Linear sweep voltammograms of H<sub>2</sub>PtCl<sub>6</sub> (10 mM) and HQ (10 mM) measured independently in 0.1 M Bu<sub>4</sub>NClO<sub>4</sub>/MeCN using an Au working electrode (10 mm × 10 mm) for 0.5–2 V and a ITO working electrode (10 mm × 10 mm) for 0.5–2 V, respectively, at a scan rate of 100 mV/s.

#### *Template-based Constant Potential Electrolysis in a Conventional Method*

50 mM of metal salt (CoCl<sub>2</sub> or Pt(acac)<sub>2</sub>) was dissolved in 0.1 M TBAP/MeCN. AAO membrane (200 nm pore size, 60 μm thickness, 13 mm diameter) coated on one side with Au was embedded on an ITO (20 mm × 20 mm), which was utilized as a cathode. After the template was immersed and impregnated with the electrolyte for 30 min, the constant potential electrolysis (−1.8 V vs. SCE) was

performed for the electrodeposition of Co and Pt by applying 2.2 C and 1.0 C, respectively, with a Pt plate anode. After the electrolysis, the ITO with a AAO membrane was removed completely by immersing it in 1 M KOH aq for 12 h. The resultant sample was carefully washed with water and MeCN, and dried.

#### *Estimation of Cell Factors and $\Delta V_{BPE}$*

In order to estimate a cell factor, i.e., the electric field transmission efficiency  $\theta$ , a ratio of electric field inside the cell ( $\varepsilon_{\text{eff}}$ ) and applied electric field between driving electrodes ( $\varepsilon$ ) is defined as follows.<sup>1,2</sup>

$$\theta = \frac{\varepsilon_{\text{eff}}}{\varepsilon} \quad (5)$$

It follows that

$$\theta = \frac{U_m d_E}{d_m E} \quad (6)$$

and

$$U_m = \theta \frac{d_m E}{d_E} \quad (7)$$

where  $U_m$  is the potential difference measured between two microelectrodes with distance of  $d_m$ ,  $E$  is the applied voltage between the driving electrodes set with distance of  $d_E$  (Fig. S4). Based on Eq. 7, a value of  $\varepsilon$  can be estimated from slope of plots of  $U_m$  as a function of  $Ed_m/d_E$ ; thus, a potential applied between each bipolar electrode ( $\Delta V_{BPE}$ ) can be estimated as follows:

$$\Delta V_{BPE} = \theta \frac{d_{BPE} E}{d_E} \quad (8)$$

where  $d_{BPE}$  is the length of bipolar electrode. The value of  $\Delta V_{BPE}$  was stable for the time scale of the electrolysis.

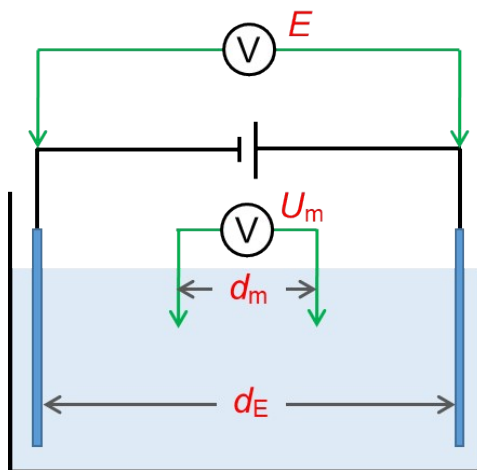

**Fig. S4** Cell configuration and definition of the parameters for the equations.

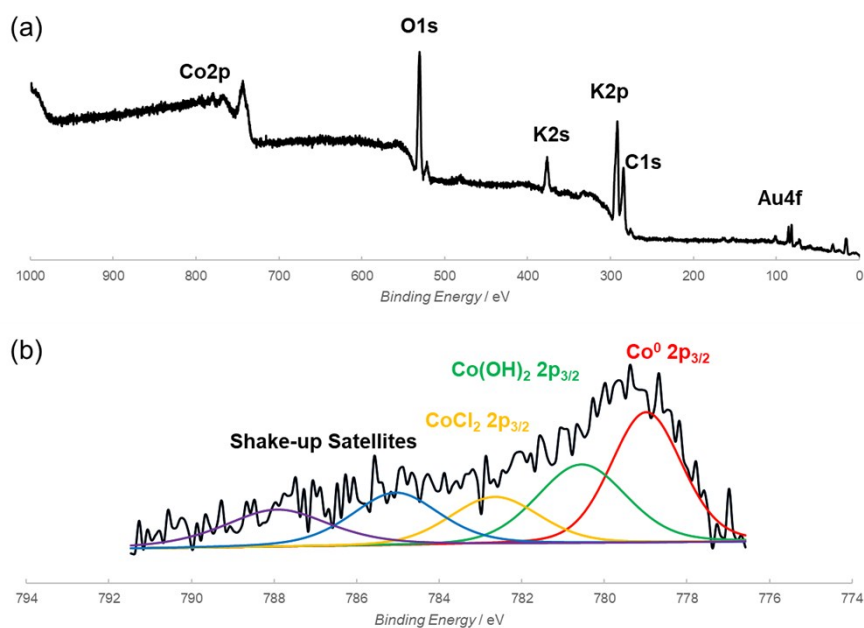

**Fig. S5** (a) XPS survey spectra for Co nanorods. (b) Deconvoluted Co2p XPS spectrum for Co nanorods.

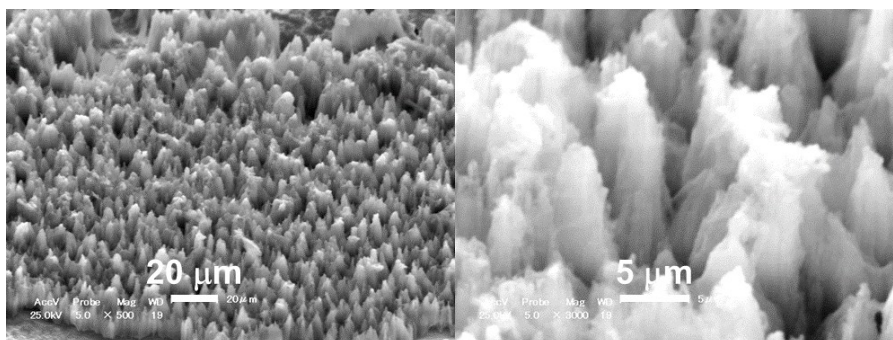

**Fig. S6** SEM images of Co nanotubes prepared by the template-based constant potential electrolysis in a conventional manner.

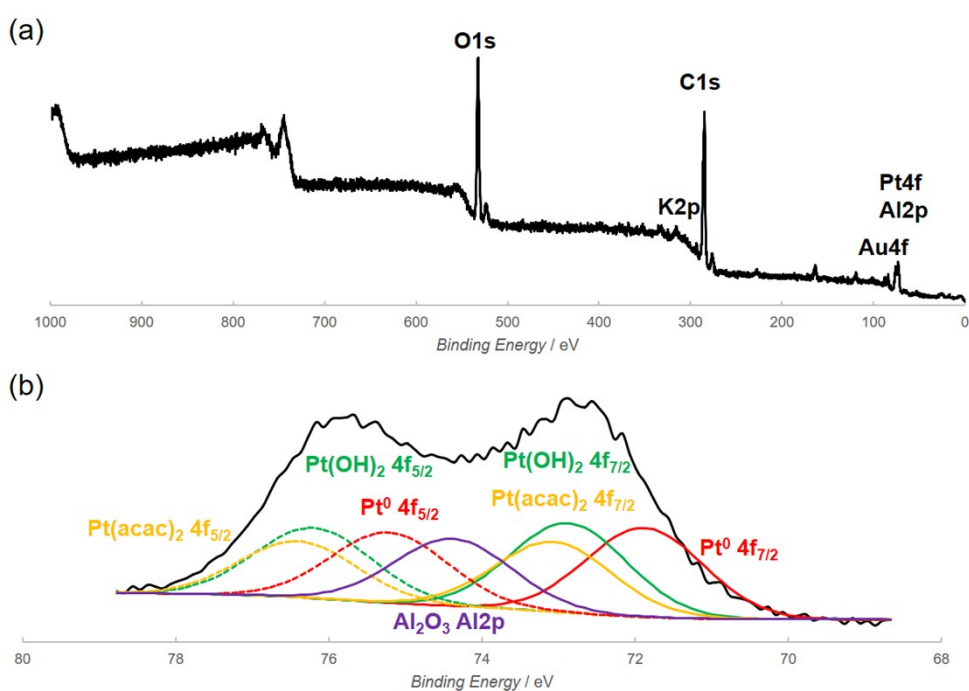

**Fig. S7** (a) XPS survey spectrum for Pt nanorods. (b) Deconvoluted Pt4f XPS spectrum for Pt nanorods.

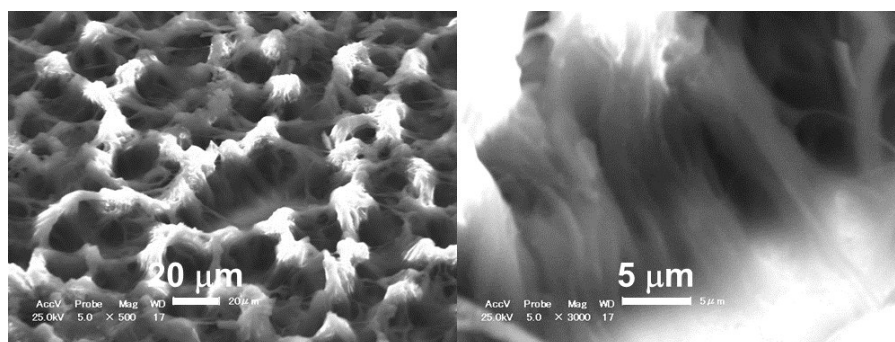

**Fig. S8** SEM images of Pt nanotubes prepared by the template-based constant potential electrolysis in a conventional manner.

## References

1. G. Loget, J. Roche and A. Kuhn, *Adv. Mater.*, 2012, **24**, 5111–5116.
2. Y. Koizumi, N. Shida, I. Tomita and S. Inagi, *Chem. Lett.*, 2014, **43**, 1245–1247.
